# Supplementary material for: Unveiling the new function of uranyl molecular clusters as fluorometric sensors for UV and X-ray dosimetry
Source: Royal Society of Chemistry journal article supplement (doi:10.1039/d1dt04225d), 2022-01-01
Supplement: d1dt04225d1.pdf [file d1dt04225d1.pdf]

## Supplemental Information

# Unveiling the New Function of Uranyl Molecular Clusters as a Fluorometric Sensor for UV and X-ray Dosimetry

Huangjie Lu <sup>b,c</sup>, Zhaofa Zheng <sup>b,c</sup>, Yuan Qian <sup>b,c</sup>, Jian-Qiang Wang <sup>b,c, \*</sup>, Jian Lin <sup>a, \*</sup>

---

\* Jian-Qiang Wang.

*E-mail address:* wangjianqiang@sinap.ac.cn

\* Jian Lin.

*E-mail address:* jianlin@xjtu.edu.cn

## Table of Contents

|                                                                                                                                                                                                                               |    |
|-------------------------------------------------------------------------------------------------------------------------------------------------------------------------------------------------------------------------------|----|
| Table of Contents .....                                                                                                                                                                                                       | 2  |
| S1. Experimental Procedures.....                                                                                                                                                                                              | 3  |
| S1.1 Materials and Synthesis.....                                                                                                                                                                                             | 3  |
| S1.2 Characterizations .....                                                                                                                                                                                                  | 3  |
| S2. Supplemental Figures and Tables.....                                                                                                                                                                                      | 5  |
| Fig. S1. The nearest $\pi$ - $\pi$ distances of phen ligands in 1 and 2. ....                                                                                                                                                 | 5  |
| Fig. S2. (a) The FTIR spectra of phen and 1 (before and after irradiation with UV, X-ray, and $\gamma$ -ray). (b) The FTIR spectra of phen and 2 (inset: FTIR spectrum of 2 ranging from 700 to 1400 $\text{cm}^{-1}$ ). .... | 5  |
| Fig. S3. Luminescence spectra of 1, 2, and phen under 365 nm UV excitation. ....                                                                                                                                              | 6  |
| Fig. S4. The baseline intensity of blank sample in dark. ....                                                                                                                                                                 | 6  |
| Fig. S5. Luminescence spectra of 1 upon alternative X-ray irradiation and heating treatments. ....                                                                                                                            | 7  |
| Fig. S6. The theoretical and experimental PXRD patterns of 1 before and after irradiation with UV, X-, and $\gamma$ -ray.....                                                                                                 | 7  |
| Fig. S7. The stability measurement of radiation-induced radicals. The inset shows the luminescence spectra before irradiation, after irradiation (2h), and after being stored in dark for 0, 1, 3, 7, 12, and 24 h. ....      | 8  |
| Fig. S8. PXRD patterns of (a) 1 and (b) 2 treated with different relative humidity (RH) conditions (35%, 65%, and 95%).....                                                                                                   | 8  |
| Fig. S9. Temperature-dependent PXRD patterns of (a) 1 and (b) 2 showing that the structure of 1 remains unchanged upon heating to 290 $^{\circ}\text{C}$ . ....                                                               | 9  |
| Fig. S10. Thermogravimetric curves of 1 and 2. ....                                                                                                                                                                           | 9  |
| Table S1. Crystallographic data of 1 and 2.....                                                                                                                                                                               | 10 |
| Table S2. Bond valent sum (BVS) analysis on 2.....                                                                                                                                                                            | 10 |
| Table S3. Selected bond lengths and bond angles of 1.....                                                                                                                                                                     | 11 |
| Table S4. Selected bond lengths and bond angles of 2.....                                                                                                                                                                     | 11 |
| S3. References .....                                                                                                                                                                                                          | 12 |

## S1. Experimental Procedures

### S1.1 Materials and Synthesis

**Caution!** All uranium compounds used and investigated were operated in an authorized laboratory designed for actinide element studies. Standard protections for radioactive materials should be followed.

**Materials.** All reagents were purchased from chemical reagent suppliers and used without further purification.  $\text{UO}_2(\text{NO}_3)_2 \cdot 5\text{H}_2\text{O}$  (99.99%),  $\text{UO}_2(\text{CH}_3\text{COO})_2 \cdot 2\text{H}_2\text{O}$  (99.99%),  $\text{Eu}(\text{NO}_3)_3 \cdot 6\text{H}_2\text{O}$  (99.99%, Aladdin Co.), and 1,10-phenanthroline monohydrate (phen, 99.99%, Aladdin Co.).

**Synthesis.** For **1**,  $\text{UO}_2(\text{CH}_3\text{COO})_2 \cdot 2\text{H}_2\text{O}$  (0.1 mmol, 0.0424 g) and phen (0.1 mmol, 0.0198 g) were charged into a 5 mL vial and then dissolved in 2 mL deionized water. Subsequently, the samples were sealed and heated at 100 °C for 1 day. For **2**,  $\text{UO}_2(\text{NO}_3)_2 \cdot 5\text{H}_2\text{O}$  (0.1 mmol, 0.0502 g),  $\text{Eu}(\text{NO}_3)_3 \cdot 6\text{H}_2\text{O}$  (0.1 mmol, 0.0446 g), and phen (0.1 mmol, 0.0198 g) were charged into a 5 mL vial and then dissolved using 1 mL deionized water and 1 mL DMF. Subsequently, the samples were sealed and heated at 90 °C for 1 day. The single crystals **1** and **2** were washed by deionized water and ethanol, and then dried at room temperature.

### S1.2 Characterizations

**Crystallographic Analysis.** Single-crystal XRD data **1** and **2** were collected on a Bruker D8-Venture single-crystal X-ray diffractometer equipped with an I $\mu$ S 3.0 microfocus X-ray source (Mo-K $\alpha$  radiation,  $\lambda = 0.71073 \text{ \AA}$ ) and a CMOS detector at 298 K. The data frames were collected using the *APEX3* program and processed using the *SAINTE* routine. The empirical absorption correction was applied using the *SADABS* program.<sup>1</sup> The structure was solved by Intrinsic Phasing with *ShelXT*<sup>2</sup> and refined with *ShelXL*<sup>3</sup> using *OLEX2*<sup>4</sup>. All the non-H atoms were subjected to anisotropic refinement by full-matrix program and refined with a full-matrix least-squares technique. Anisotropic thermal parameters were applied to all nonhydrogen atoms. Contributions to scattering due to these highly disordered solvent molecules were removed in **2** using the *SQUEEZE* routine of *PLATON*.<sup>3,5</sup> Structures were then refined again using the data generated.

**Powder X-ray diffraction (PXRD).** Data were collected from 5 to 50° with a step of 0.02° and the time for data collection was 0.2–0.5 s on a Bruker D8 Advance diffractometer with Cu K $\alpha$  radiation ( $\lambda = 1.54056 \text{ \AA}$ ) and a Lynxeye one-dimensional detector.

**Luminescence Spectroscopy.** The single crystal solid-state luminescence spectra were recorded on a Craic Technologies microspectrophotometer. Crystals were placed on quartz slide, and data was collected after auto-set optimization. When the 365 nm excitation light (2mW) was selected, an optical filter masking signal below 420 nm was applied in order to mask the interference of excitation light.

**Fourier Transform Infrared Spectroscopy.** The FTIR spectra were recorded in the range of 400–4000  $\text{cm}^{-1}$  using a Thermo Nicolet 6700 FTIR spectrometer equipped with a diamond attenuated total reflectance (ATR) accessory.

**Thermalgravimetric Analysis (TGA).** TGA was carried out in an  $\text{N}_2$  atmosphere with a heating rate of 10  $^{\circ}\text{C}/\text{min}$  from 30 to 900  $^{\circ}\text{C}$  on a NETZSCH STA 449 F3 Jupiter instrument.

**Electron Paramagnetic Resonance (EPR) Study.** The electron paramagnetic resonance (EPR) measurements were performed on a JEOL-FA200 spectrometer at the X-band with 100 kHz field modulation. The EPR spectra of nonirradiated and irradiated samples were recorded at room temperature and the microwave power used was 1.0 mW.

**Radiolytic Stability.** The radiation resistance was examined by irradiating the powdery sample with UV, X-ray, or  $\gamma$ -ray. X-ray and  $\gamma$ -ray were provided by a  $\text{Cu K}\alpha$  radiation source (60 kV, 12W) and a  $^{60}\text{Co}$  irradiation source ( $2.22 \times 10^{15}$  Bq), respectively. **1** was irradiated with X-ray and  $\gamma$ -ray with dose rates of 7.2 and 11.8 kGy/h, respectively. PXRD, FTIR, and SCXRD analyses on the irradiated samples were performed to confirm the radiation resistance of **1**.

## S2. Supplemental Figures and Tables

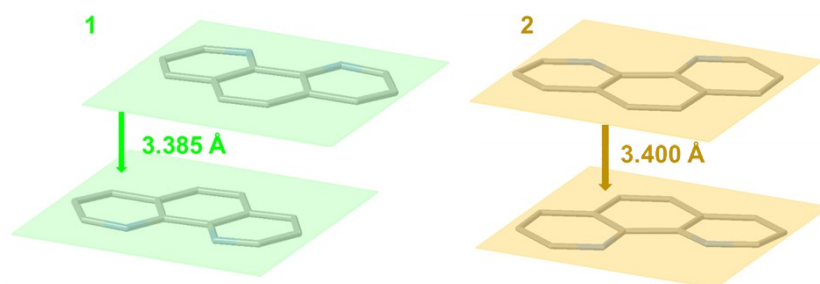

**Fig. S1.** The nearest  $\pi$ - $\pi$  distances of phen ligands in **1** and **2**.

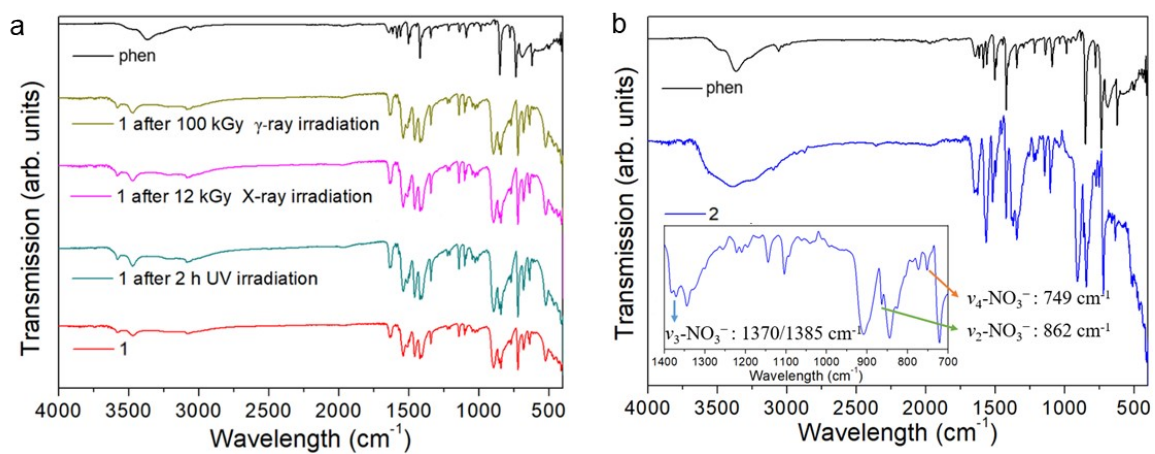

**Fig. S2.** (a) The FTIR spectra of phen and **1** (before and after irradiation with UV, X-ray, and  $\gamma$ -ray). (b) The FTIR spectra of phen and **2** (inset: FTIR spectrum of **2** ranging from 700 to 1400  $\text{cm}^{-1}$ ).

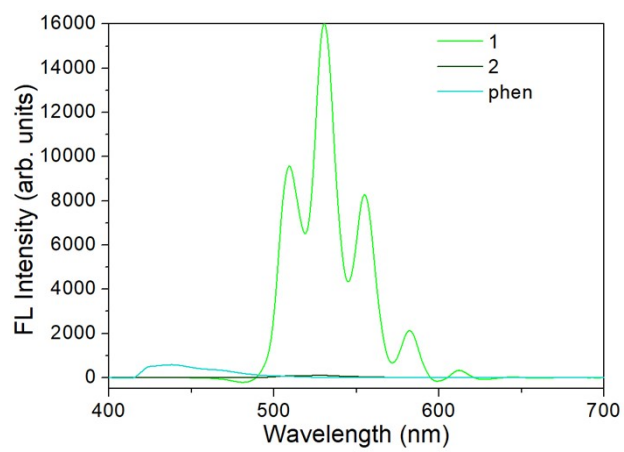

**Fig. S3.** Luminescence spectra of **1**, **2**, and phen under 365 nm UV excitation.

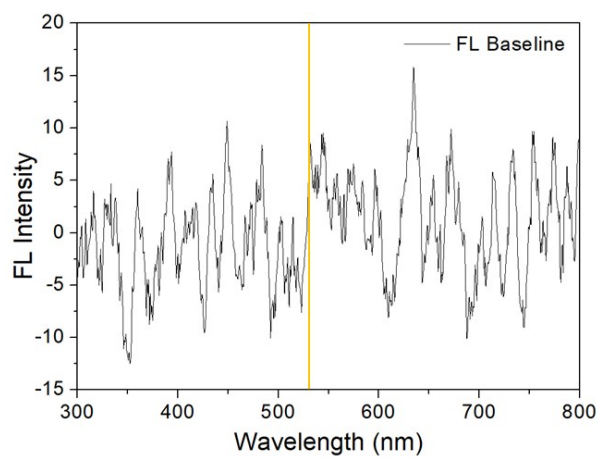

**Fig. S4.** The baseline intensity of blank sample in dark.

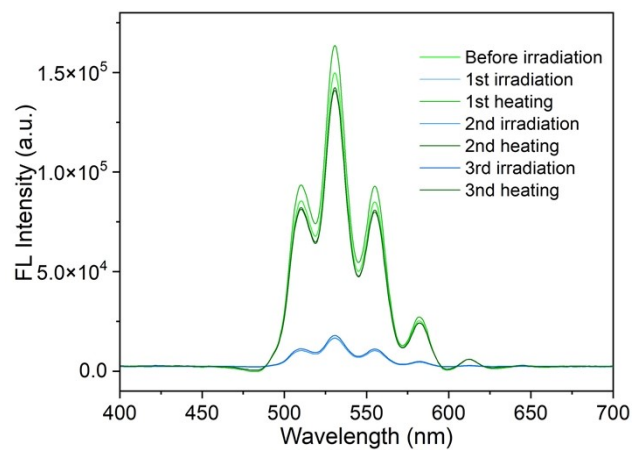

**Fig. S5.** Luminescence spectra of **1** upon alternative X-ray irradiation and heating treatments.

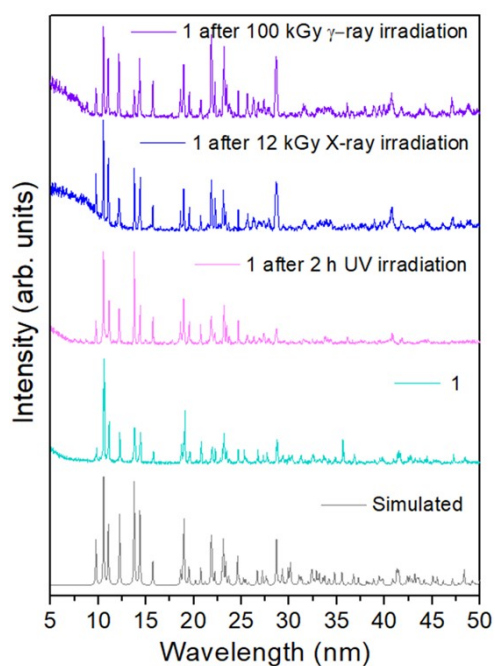

**Fig. S6.** The theoretical and experimental PXRD patterns of **1** before and after irradiation with UV, X-, and  $\gamma$ -ray.

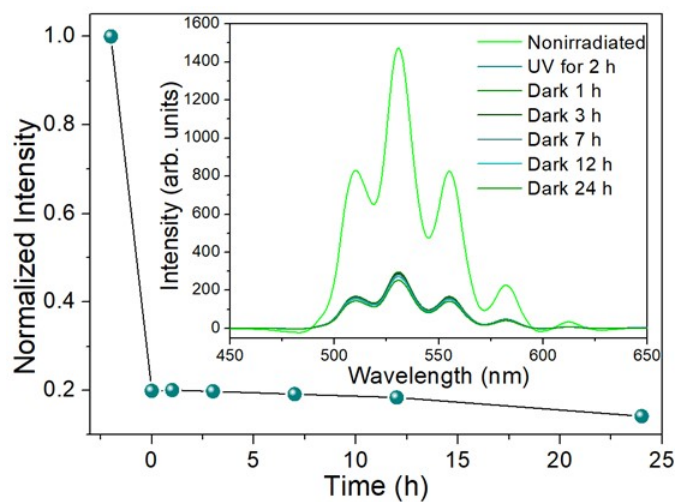

**Fig. S7.** The stability measurement of radiation-induced radicals. The inset shows the luminescence spectra before irradiation, after irradiation (2h), and after being stored in dark for 0, 1, 3, 7, 12, and 24 h.

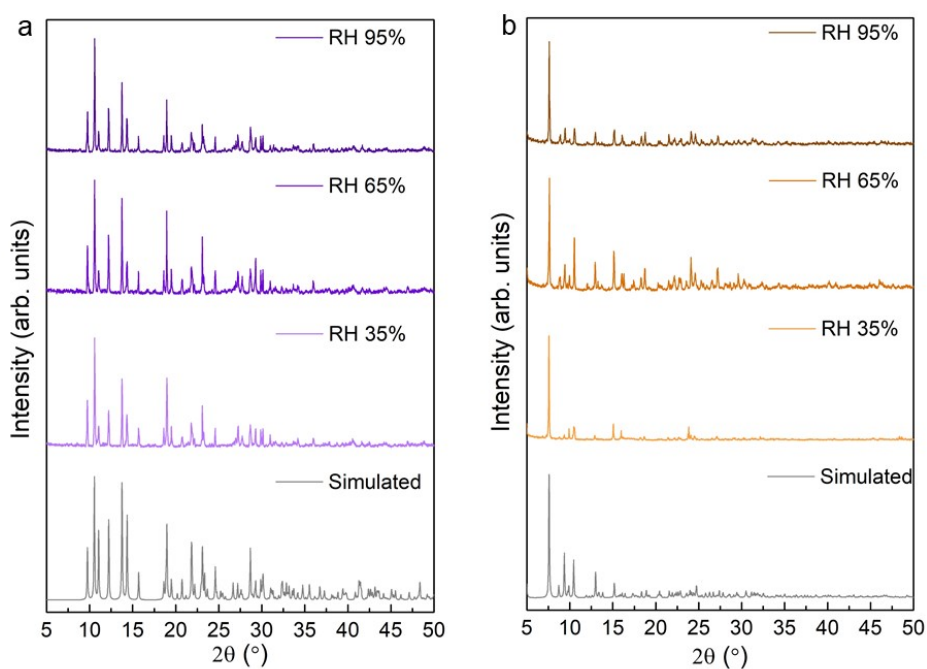

**Fig. S8.** PXRD patterns of (a) **1** and (b) **2** treated with different relative humidity (RH) conditions (35%, 65%, and 95%).



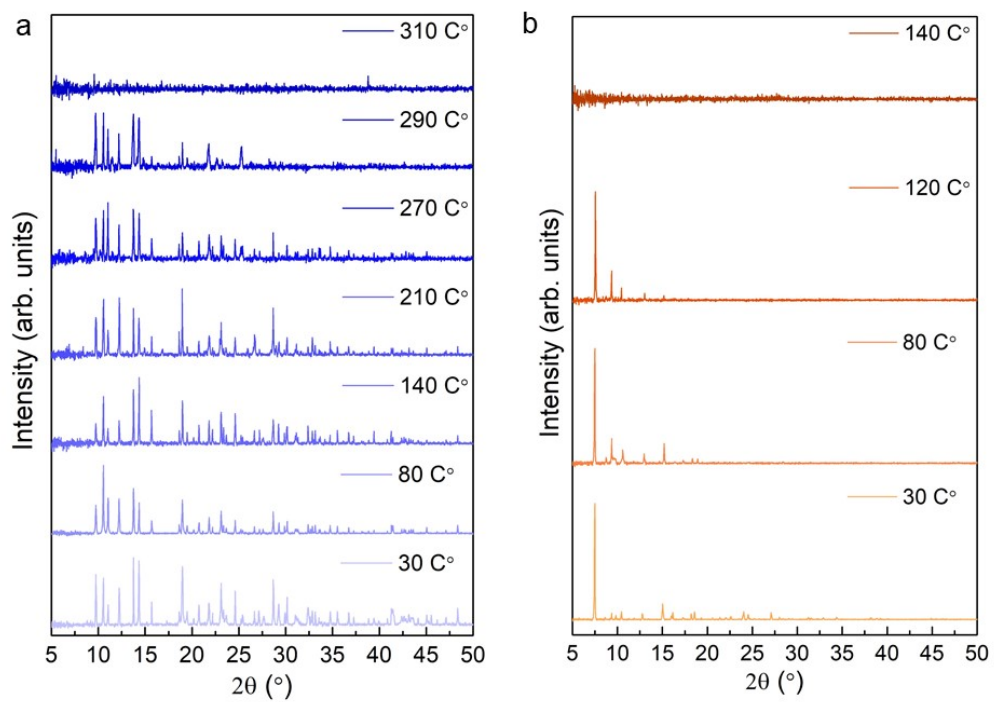

**Fig. S9.** Temperature-dependent PXRD patterns of (a) **1** and (b) **2** showing that the structure of **1** remains unchanged upon heating to 290 °C.

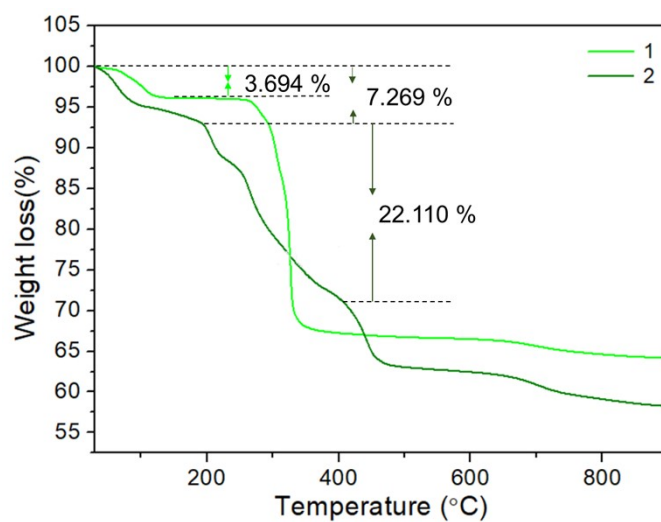

**Fig. S10.** Thermogravimetric curves of **1** and **2**.

**Table S1.** Crystallographic data of **1** and **2**.

| Compound                              | <b>1</b> before irradiation | <b>1</b> after irradiation | <b>2</b>    |
|---------------------------------------|-----------------------------|----------------------------|-------------|
| <i>Mass</i>                           | 1028.38                     | 1028.38                    | 2885.04     |
| Color                                 | Yellow                      | Yellow                     | Yellow      |
| Habit                                 | Block                       | Block                      | Block       |
| Space group                           | $P2_1/n$                    | $P2_1/n$                   | $P-1$       |
| <i>a</i> (Å)                          | 9.4351(3)                   | 9.4343(17)                 | 11.781(4)   |
| <i>b</i> (Å)                          | 9.1130(3)                   | 9.111(2)                   | 12.086(5)   |
| <i>c</i> (Å)                          | 17.3744(7)                  | 17.414(4)                  | 18.056(7)   |
| $\alpha$ (deg)                        | 90                          | 90                         | 93.371(13)  |
| $\beta$ (deg)                         | 105.329(1)                  | 105.302(6)                 | 95.937(12)  |
| $\gamma$ (deg)                        | 90                          | 90                         | 104.737(12) |
| <i>V</i> (Å <sup>3</sup> )            | 1440.74(9)                  | 1443.8(5)                  | 2463.3(16)  |
| <i>Z</i>                              | 2                           | 2                          | 1           |
| <i>T</i> (K)                          | 293(2)                      | 293(2)                     | 296(2)      |
| $\lambda$ (Å)                         | 0.71073                     | 0.71073                    | 0.71073     |
| <i>Max 2<math>\theta</math></i> (deg) | 55.110                      | 55.114                     | 55.166      |
| $\rho_{calcd}$ (g cm <sup>-3</sup> )  | 2.371                       | 2.365                      | 1.945       |
| $\mu$ (Mo K $\alpha$ )                | 0.71073                     | 0.71073                    | 0.71073     |
| <i>R</i> <sub>1</sub>                 | 0.0228                      | 0.0219                     | 0.0360      |
| <i>wR</i> <sub>2</sub>                | 0.0633                      | 0.0618                     | 0.1068      |
| <i>R</i> <sub>int</sub>               | 0.0442                      | 0.0470                     | 0.0515      |
| <i>GOF</i>                            | 1.010                       | 1.023                      | 1.062       |

**Table S2.** Bond valent sum (BVS) analysis on **2**.

| Atom | BVS  | Assignment            |
|------|------|-----------------------|
| U1   | 5.83 |                       |
| U2   | 5.75 |                       |
| U3   | 5.76 |                       |
| O1   | 1.96 | $\mu_3\text{-O}^{2-}$ |
| O2   | 1.28 | $\mu_2\text{-OH}^-$   |
| O4   | 1.18 | $\mu_2\text{-OH}^-$   |
| O3   | 1.65 |                       |
| O5   | 1.68 |                       |
| O6   | 1.66 |                       |
| O7   | 1.68 |                       |
| O8   | 1.70 |                       |
| O9   | 1.69 |                       |
| O10  | 2.15 |                       |
| O11  | 1.96 |                       |

**Table S3.** Selected bond lengths and bond angles of **1**.

| Bond length (Å) and bond angle (°) |       |            |                   |       |            |
|------------------------------------|-------|------------|-------------------|-------|------------|
| Before irradiation                 |       |            | After irradiation |       |            |
| U=O                                | U1-O1 | 1.773(4)   | U=O               | U1-O1 | 1.772(4)   |
|                                    | U1-O2 | 1.766(3)   |                   | U1-O2 | 1.771(3)   |
| U-N/O                              | U1-N1 | 2.646(4)   | U-N/O             | U1-N1 | 2.649(4)   |
|                                    | U1-N2 | 2.648(3)   |                   | U1-N2 | 2.643(3)   |
|                                    | U1-O3 | 2.334(3)   |                   | U1-O3 | 2.340(3)   |
|                                    | U1-O4 | 2.287(3)   |                   | U1-O4 | 2.291(3)   |
|                                    | U1-O4 | 2.343(3)   |                   | U1-O4 | 2.341(3)   |
| $\angle O2=U1=O1$                  |       | 174.83(16) | $\angle O2=U1=O1$ |       | 175.03(15) |

**Table S4.** Selected bond lengths and bond angles of **2**.

| Bond length (Å) or bond angle (°) |          |          |
|-----------------------------------|----------|----------|
| U=O                               | U1-O5    | 1.782(5) |
|                                   | U1-O8    | 1.775(5) |
|                                   | U2-O3    | 1.792(5) |
|                                   | U2-O9    | 1.778(6) |
|                                   | U3-O6    | 1.787(5) |
|                                   | U3-O7    | 1.782(5) |
| U-N/O                             | U1-N2    | 2.638(6) |
|                                   | U1-N3    | 2.641(6) |
|                                   | U2-N1    | 2.660(6) |
|                                   | U2-N5    | 2.679(6) |
|                                   | U3-N4    | 2.635(6) |
|                                   | U3-N6    | 2.680(6) |
|                                   | U1-O1    | 2.313(5) |
|                                   | U1-O2    | 2.310(5) |
|                                   | U1-O4    | 2.323(5) |
|                                   | U2-O1    | 2.264(5) |
|                                   | U2-O4    | 2.328(5) |
|                                   | U2-O10   | 2.356(6) |
|                                   | U3-O1    | 2.245(5) |
|                                   | U3-O2    | 2.354(5) |
| U3-O11                            | 2.365(6) |          |
| $\angle O5=U1=O8$                 |          | 174.7(2) |
| $\angle O3=U2=O9$                 |          | 176.4(2) |
| $\angle O6=U3=O7$                 |          | 175.3(2) |

### S3. References

1. G. M. Sheldrick, 1996.
2. G. M. Sheldrick, *Acta Crystallogr. Sect. A: Found. Adv.*, 2015, **71**, 3.
3. G. M. Sheldrick, *Acta Crystallogr. Sect. C: Struct. Chem.*, 2015, **71**, 3.
4. O. V. Dolomanov, L. J. Bourhis, R. J. Gildea, J. A. K. Howard and H. Puschmann, *J. Appl. Cryst.*, 2009, **42**, 339.
5. A. L. Spek, *Acta Crystallogr. Sect. C: Struct. Chem.*, 2015, **71**, 9.
